# Supplementary material for: Novel vocal repertoire and paired swimbladders of the three-spined toadfish,Batrachomoeus trispinosus: insights into the diversity of the Batrachoididae
Source: Oxford University Press journal article supplement (doi:10.1242/jeb.028506), 2009-04-17
Supplement: jeb028506supptable.pdf [file jeb028506supptable.pdf]

Table S1. GenBank accession numbers of toadfish genes used in phylogenetic analysis

| Taxon                             | 16S       | 28S        | COI       | CytB      |
|-----------------------------------|-----------|------------|-----------|-----------|
| Batrachoididae                    |           |            |           |           |
| <i>Allenbatrachus grunniens</i>   | DQ532835  | DQ532990   | AF165342  | –         |
| <i>Batrachomoeus trispinosus</i>  | AP006738  | –          | AP006738  | AP006738  |
| <i>Daector quadrizonatus</i>      | DQ532862  | DQ533018   | –         | –         |
| <i>Halobatrachus didactylus</i>   | AY368308  | AH013447S1 | AF165341  | AF165351  |
| <i>Opsanus beta</i>               | DQ532925  | DQ533084   | AF165336  | AF165346  |
| <i>Opsanus pardus</i>             | DQ874745  | –          | AF165337  | AF165347  |
| <i>Opsanus phobetron</i>          | –         | –          | AF165338  | AF165348  |
| <i>Opsanus tau</i>                | AY292597  | AF152151   | AF165339  | AF165349  |
| <i>Perulibatrachus elminensis</i> | DQ532935  | DQ533094   | –         | –         |
| <i>Porichthys myriaster</i>       | AY820728  | –          | AP006739  | AP006739  |
| <i>Porichthys notatus</i>         | DQ532942  | DQ533101   | AF165343  | AF165352  |
| <i>Thalassophryne amazonica</i>   | DQ532971  | DQ533131   | –         | –         |
| Outgroup                          |           |            |           |           |
| <i>Gadus morhua</i>               | NC_002081 | AY141485   | NC_002081 | NC_002081 |

Missing genes are denoted by –. 16S, cytochrome oxidase subunit I (COI) and cytochrome b (CytB) sequences for *B. trispinosus*, *G. morhua* and *P. myriaster* are from complete annotated mitochondrial genome.
